# Supplementary material for: Rice diversity panel provides accurate genomic predictions for complex traits in the progenies of biparental crosses involving members of the panel
Source: PubMed Central journal article supplement (PMC5787227; doi:10.1007/s00122-017-3011-4), 2017-11-14
Supplement: 122_2017_3011_MOESM1_ESM.pdf [file 122_2017_3011_MOESM1_ESM.pdf]

**Supplementary Table 1:** List of the 284 accessions of the reference population and their main characteristics.

| ID    | Name                | Origin | Class  | Year of registration | Group  | FL (days) | NI    | PW (g) | Parental line of PP | Most related to PP parent |
|-------|---------------------|--------|--------|----------------------|--------|-----------|-------|--------|---------------------|---------------------------|
| TP001 | AIACE               | Italy  | long A | 2003                 | J-Trop | 89.17     | 24.83 | 224.93 | 1                   |                           |
| TP002 | APOLLO              | Italy  | long B | 2002                 | J-Trop | 91.50     | 25.51 | 290.96 | 1                   |                           |
| TP003 | ASIA                | Italy  | long B | 2002                 | J-Trop | 100.83    | 25.05 | 256.55 | 1                   |                           |
| TP004 | AUGUSTO             | Italy  | long A | 2002                 | J-Temp | 86.67     | 23.05 | 325.11 | 1                   |                           |
| TP005 | BALDO               | Italy  | long A | 1977                 | J-Temp | 93.33     | 23.38 | 493.42 | 1                   |                           |
| TP006 | CARMEN              | Italy  | long A | 2005                 | J-Temp | 84.33     | 25.10 | 320.91 | 1                   |                           |
| TP007 | CARNAROLI           | Italy  | long A | 1983                 | J-Temp | 100.50    | 25.86 | 453.83 | 1                   |                           |
| TP008 | CENTAURO            | Italy  | round  |                      | J-Temp | 87.00     | 26.76 | 253.37 | 1                   |                           |
| TP009 | CRESO               | Italy  | long A |                      | J-Temp | 92.33     | 25.55 | 345.35 | 1                   |                           |
| TP010 | DELFINO             | Italy  | long A | 2001                 | J-Temp | 89.00     | 26.28 | 328.77 | 1                   |                           |
| TP011 | DIMITRA             | Greece | long A |                      | J-Temp | 95.17     | 24.38 | 366.35 | 1                   |                           |
| TP012 | EUROSIS             | Italy  | long B |                      | J-Trop | 91.33     | 24.34 | 345.08 | 1                   |                           |
| TP013 | FRAGRANCE           | Italy  | long B |                      | J-Trop | 93.33     | 28.91 | 250.71 | 1                   |                           |
| TP014 | GIANO               | Italy  | long B | 2003                 | J-Temp | 91.67     | 25.23 | 222.93 | 1                   |                           |
| TP015 | GIGANTE VERCELLI    | Italy  | long A | 1967                 | J-Temp | 94.67     | 25.23 | 498.52 | 1                   |                           |
| TP016 | GLADIO              | Italy  | long B | 1998                 | J-Trop | 88.17     | 23.46 | 256.84 | 1                   |                           |
| TP017 | HANDAO 11           | China  | round  |                      | J-Temp | 81.50     | 25.14 | 167.02 | 1                   |                           |
| TP018 | HANDAO 297          | China  | round  |                      | J-Temp | 94.50     | 27.04 | 382.14 | 1                   |                           |
| TP019 | KARNAK              | Italy  | long A | 2002                 | J-Temp | 99.83     | 24.85 | 420.44 | 1                   |                           |
| TP020 | KORAL               | Italy  | long A | 1981                 | J-Temp | 91.17     | 26.16 | 427.84 | 1                   |                           |
| TP021 | LOTO                | Italy  | long A | 1988                 | J-Temp | 85.83     | 24.45 | 272.71 | 1                   |                           |
| TP022 | LUXOR               | Italy  | long A | 2008                 | J-Temp | 97.33     | 25.66 | 427.48 | 1                   |                           |
| TP023 | MARATELLI           | Italy  | medium | 1919                 | J-Temp | 91.33     | 24.80 | 416.15 | 1                   |                           |
| TP024 | NEMBO               | Italy  | long A | 1999                 | J-Temp | 87.67     | 28.20 | 370.04 |                     | 1                         |
| TP025 | OPALE               | Italy  | long A | 2008                 | J-Temp | 89.00     | 26.50 | 449.75 | 1                   |                           |
| TP026 | PECOS               | USA    | medium |                      | J-Temp | 99.50     | 22.29 | 411.32 | 1                   |                           |
| TP027 | PERLA               | Italy  | round  | 1998                 | J-Temp | 91.83     | 23.75 | 258.56 | 1                   |                           |
| TP028 | SELENIO             | Italy  | round  | 1987                 | J-Temp | 90.17     | 25.35 | 336.00 | 1                   |                           |
| TP029 | SIS R215            | Italy  | long A | 2002                 | J-Trop | 90.67     | 24.02 | 325.39 | 1                   |                           |
| TP030 | TEJO                | Italy  | long A | 1999                 | J-Temp | 92.67     | 24.16 | 311.97 | 1                   |                           |
| TP031 | VIALONE NANO        | Italy  | medium | 1967                 | J-Temp | 91.83     | 25.11 | 395.09 | 1                   |                           |
| TP032 | VOLANO              | Italy  | long A | 1972                 | J-Temp | 95.17     | 25.28 | 349.97 | 1                   |                           |
| TP033 | A201                | USA    | long B |                      | J-Trop | 100.33    | 19.86 | 277.11 |                     | 1                         |
| TP034 | A301                | USA    | long B | 1987                 | J-Trop | 106.67    | 23.40 | 229.51 |                     | 1                         |
| TP035 | ADAIR               | USA    | long B | 1993                 | J-Trop | 101.67    | 26.66 | 327.86 |                     |                           |
| TP036 | ADELAIDE CHIAPPELLI | Italy  | long A |                      | J-temp | 85.54     | 24.51 | 265.95 |                     |                           |
| TP037 | AGATA               | Italy  | round  | 2012                 | J-Temp | 93.50     | 26.90 | 300.51 |                     | 1                         |
| TP038 | AGOSTANO            | Italy  | long A | 1933                 | J-Temp | 85.50     | 23.03 | 363.20 |                     | 1                         |
| TP039 | AKITAKOMACHI        | Japon  | round  |                      | J-Temp | 92.83     | 21.30 | 234.48 |                     | 1                         |
| TP040 | ALAN                | USA    | long B |                      | J-Trop | 97.00     | 17.30 | 357.33 |                     |                           |
| TP041 | ALEXANDROS          | Greece | long B |                      | J-Trop | 100.83    | 19.85 | 256.60 |                     |                           |
| TP042 | ALICE               | Italy  | long A | 1996                 | J-Temp | 89.83     | 24.28 | 388.02 |                     |                           |

|       |                |          |        |      |        |        |       |        |   |
|-------|----------------|----------|--------|------|--------|--------|-------|--------|---|
| TP043 | ALLORIO        | Italy    | long A | 1915 | J-Temp | 88.33  | 22.88 | 373.31 | 1 |
| TP044 | ALPE           | Italy    | long A | 1993 | J-Temp | 81.33  | 24.42 | 290.28 |   |
| TP045 | ALPHA          | Italy    | long A | 1979 | J-Temp | 88.17  | 22.59 | 301.94 |   |
| TP046 | AMERICANO 1600 | Italy    | round  | 1904 | J-Temp | 92.67  | 21.52 | 341.21 | 1 |
| TP047 | ANSEATICO      | Italy    | long A | 1972 | J-Temp | 96.83  | 25.59 | 351.35 |   |
| TP048 | ANTARES        |          |        |      | J-Temp | 95.50  | 30.78 | 280.59 |   |
| TP049 | ANTONI         | Bulgary  | long A |      | J-Temp | 76.33  | 18.94 | 220.37 |   |
| TP050 | ARBORIO        | Italy    | long A | 1967 | J-Temp | 95.17  | 23.84 | 451.13 | 1 |
| TP051 | ARGO           | Italy    | medium | 1978 | J-Temp | 94.17  | 20.67 | 427.20 |   |
| TP052 | ARIETE         | Italy    | long A | 1985 | J-Temp | 92.00  | 25.63 | 358.59 | 1 |
| TP053 | ARSENAL        | Italy    | long B |      | J-Trop | 92.50  | 26.15 | 252.37 |   |
| TP054 | ARTEMIDE       | Italy    | long B |      | J-Temp | 95.00  | 20.34 | 257.23 |   |
| TP055 | BAHIA          | Spain    | medium |      | J-Temp | 95.33  | 29.15 | 432.60 |   |
| TP056 | BAIXET         | Spain    | long A |      | J-Temp | 89.67  | 27.72 | 303.40 |   |
| TP057 | BALILLA        | Italy    | round  | 1967 | J-Temp | 96.00  | 28.00 | 368.00 | 1 |
| TP058 | BALZARETTI     | Italy    | medium |      | J-Temp | 92.00  | 17.88 | 330.87 |   |
| TP059 | BARAGGIA       | Italy    | round  | 1957 | J-Temp | 86.33  | 24.98 | 294.22 |   |
| TP060 | BEIRAO         | Portugal | long A |      | J-Temp | 78.00  | 21.92 | 264.22 |   |
| TP061 | BELLE PATNA    | USA      | long B |      | J-Trop | 103.17 | 18.17 | 392.14 |   |
| TP062 | BENGAL         | USA      | long A |      | J-Temp | 104.67 | 22.09 | 368.63 |   |
| TP063 | BERTONE        | Italy    | long A | 1930 | J-Temp | 77.17  | 19.32 | 254.63 |   |
| TP064 | BIANCA         | Italy    | long A | 2002 | J-Temp | 95.33  | 24.37 | 450.70 |   |
| TP065 | BOMBILLA       | Spain    | medium |      | J-Temp | 92.50  | 20.12 | 287.26 |   |
| TP066 | BOMBON         | Spain    | medium | 1975 | J-Temp | 109.67 | 19.90 | 351.63 |   |
| TP067 | BONNI          | Italy    | long A |      | J-Temp | 84.50  | 17.03 | 380.53 |   |
| TP068 | BRAZOS         | USA      | long A |      | J-Trop | 98.00  | 20.91 | 289.72 |   |
| TP069 | BURMA          | Italy    | long A |      | J-Trop | 87.67  | 22.12 | 351.93 |   |
| TP070 | CALENDAL       | France   | long A |      | J-Temp | 94.50  | 20.03 | 487.83 |   |
| TP071 | CALMOCHI 101   | USA      | medium |      | J-Temp | 90.67  | 22.26 | 293.47 |   |
| TP072 | CAMPINO        | Portugal | medium |      | J-Temp | 90.33  | 21.04 | 391.32 |   |
| TP073 | CAPATAZ        | Spain    | long A |      | J-Temp | 99.00  | 19.47 | 224.52 |   |
| TP074 | CARINA         | Bulgary  | round  |      | J-Temp | 98.83  | 19.44 | 385.08 |   |
| TP075 | CARIOCA        | Italy    | long B | 1975 | J-Trop | 86.67  | 24.38 | 293.97 |   |
| TP076 | CARNISE        | Italy    | long A |      | J-Temp | 97.00  | 24.16 | 321.94 | 1 |
| TP077 | CARRICO        | Portugal | round  |      | J-Temp | 86.50  | 22.93 | 397.08 | 1 |
| TP078 | CASTELMOCHI    | Italy    | round  |      | J-Temp | 91.33  | 25.79 | 259.90 | 1 |
| TP079 | CHIPKA         | Bulgary  | round  |      | J-Temp | 86.83  | 24.13 | 493.12 | 1 |
| TP080 | CIGALON        | France   | medium |      | J-Temp | 81.00  | 28.13 | 217.32 |   |
| TP081 | CINIA 40       | Chili    |        |      | J-Temp | 97.17  | 20.67 | 318.53 | 1 |
| TP082 | CLOT           | Spain    | medium |      | J-Temp | 89.50  | 27.58 | 326.33 |   |
| TP083 | COCODRIE       | USA      | long B | 2004 | J-Trop | 98.83  | 18.82 | 248.13 |   |
| TP084 | COLINA         | Spain    | round  |      | J-Temp | 93.50  | 28.38 | 364.00 |   |
| TP085 | CORBETTA       | Italy    | medium | 1954 | J-Temp | 83.50  | 26.71 | 527.22 | 1 |
| TP086 | CRIPTO         | Italy    |        | 1978 | J-Temp | 85.83  | 23.22 | 368.27 |   |
| TP087 | CT36           | Colombia | long B |      | J-Temp | 100.67 | 30.36 | 307.60 |   |
| TP088 | CT58           | Colombia | long A |      | J-Temp | 93.33  | 18.19 | 164.62 | 1 |
| TP089 | DELLROSE       | USA      | long A |      | J-Trop | 107.33 | 21.41 | 308.97 |   |
| TP090 | DELMONT        |          |        |      | J-Trop | 106.67 | 19.46 | 280.34 |   |

|       |                    |            |        |      |        |        |       |        |   |
|-------|--------------------|------------|--------|------|--------|--------|-------|--------|---|
| TP091 | DIXIEBELLE         | USA        | long A |      | J-Trop | 109.83 | 18.91 | 223.14 |   |
| TP092 | DOURADAO           |            |        |      | J-Trop | 96.83  | 21.60 | 371.64 |   |
| TP093 | DRAGO              | Italy      | long A | 1990 | J-Temp | 88.67  | 28.58 | 411.69 | 1 |
| TP094 | DREW               | USA        | long B |      | J-Trop | 108.00 | 21.29 | 351.29 |   |
| TP095 | DUCATO             | Italy      | round  | 2011 | J-Temp | 90.17  | 26.12 | 286.15 |   |
| TP096 | ERCOLE             | Italy      | long A |      | J-Temp | 92.83  | 24.95 | 417.66 |   |
| TP097 | ERMES              | Italy      | long B |      | J-Temp | 95.00  | 21.33 | 300.70 |   |
| TP098 | ESCARLATE          | Portugal   | round  |      | J-Temp | 81.17  | 23.44 | 223.91 |   |
| TP099 | ESTRELA            | Portugal   | long A |      | J-Temp | 84.67  | 25.06 | 238.22 |   |
| TP100 | EUROPA             | Italy      | long A | 1974 | J-Temp | 99.17  | 34.07 | 404.48 |   |
| TP101 | EUROSE             | Italy      | long A |      | J-Temp | 92.17  | 26.71 | 374.51 |   |
| TP102 | FAMILIA 181        | Portugal   | long A |      | J-Temp | 96.67  | 21.88 | 280.08 |   |
| TP103 | FAST               |            |        |      | J-Trop | 89.22  | 26.56 | 237.00 |   |
| TP104 | FIDJI              | Philippine | long B | 2001 | J-temp | 103.17 | 25.87 | 318.09 | 1 |
| TP105 | FLIPPER            | Italy      | long B | 1997 | J-Temp | 89.17  | 26.34 | 306.59 | 1 |
| TP106 | FORTUNA            | Italy      | long A |      | J-Trop | 110.67 | 16.48 | 311.94 |   |
| TP107 | FRANCES            | Spain      | medium | 2000 | J-Temp | 97.67  | 22.36 | 293.04 | 1 |
| TP108 | FULGENTE           | Italy      | medium |      | J-Temp | 88.67  | 22.17 | 386.26 |   |
| TP109 | GALILEO            | Italy      | long A | 2002 | J-Temp | 89.33  | 23.18 | 385.86 | 1 |
| TP110 | GANGE              | Italy      | long B | 1995 | J-Trop | 101.00 | 24.27 | 248.03 | 1 |
| TP111 | GARDE SADRI        | Turkey     | long A |      | J-Temp | 93.50  | 27.53 | 391.43 |   |
| TP112 | GIADA              | Italy      | long B |      | J-Trop | 101.33 | 18.96 | 338.72 |   |
| TP113 | GIOVANNI MARCHETTI | Italy      | medium | 1972 | J-Temp | 91.83  | 27.43 | 400.20 | 1 |
| TP114 | GITANO             |            |        |      | J-Temp | 86.83  | 29.05 | 313.06 |   |
| TP115 | GIZA 177           | Egypt      | medium |      | J-Temp | 96.50  | 22.32 | 308.15 |   |
| TP116 | GLORIA             |            |        |      | J-Temp | 88.83  | 23.75 | 283.21 |   |
| TP117 | GOOLARAH           |            |        |      | J-Trop | 115.67 | 17.88 | 200.95 |   |
| TP118 | GRAAL              | France     | long B |      | J-Trop | 85.83  | 24.99 | 299.24 |   |
| TP119 | GRALDO             | Italy      | long B |      | J-Temp | 91.17  | 18.99 | 312.26 |   |
| TP120 | GREGGIO            |            |        |      | J-Temp | 92.00  | 21.02 | 383.21 |   |
| TP121 | GREPPI             | Italy      | round  | 1908 | J-Temp | 104.83 | 23.49 | 384.83 | 1 |
| TP122 | GRITNA             | Italy      | long A |      | J-Temp | 83.33  | 25.99 | 356.32 |   |
| TP123 | GUADIAMAR          | Spain      | medium | 1990 | J-Temp | 89.67  | 25.02 | 256.59 |   |
| TP124 | GZ8367             | Egypt      |        |      | J-Temp | 105.17 | 17.11 | 323.29 |   |
| TP125 | HAREM              | Portugal   | long A |      | J-Temp | 104.50 | 25.55 | 350.66 |   |
| TP126 | HARRA              | Australia  | round  |      | J-Temp | 91.83  | 26.73 | 368.96 |   |
| TP127 | HONDURAS           | Spain      | long A |      | J-Trop | 115.29 | 17.73 | 231.18 |   |
| TP128 | IAC32-52           |            |        |      | J-Trop | 109.17 | 16.66 | 479.07 |   |
| TP129 | IBO 380-33         | Portugal   | long A |      | J-Temp | 88.17  | 24.67 | 258.98 |   |
| TP130 | IBO 400            | Portugal   | long A |      | J-Temp | 97.67  | 27.58 | 438.99 |   |
| TP131 | ITALMOCHI          | Italy      | medium | 1996 | J-Temp | 81.33  | 22.43 | 252.95 |   |
| TP132 | ITALPATNA 48       | Italy      | long A |      | J-Temp | 100.17 | 26.49 | 416.62 |   |
| TP133 | ITALPATNAxMILYANG  | Portugal   | long A |      | J-Temp | 93.00  | 31.03 | 306.20 |   |
| TP134 | JACINTO            | USA        | long A |      | J-Trop | 103.17 | 17.36 | 305.16 |   |
| TP135 | JEFFERSON          | USA        | long A | 1996 | J-Trop | 97.33  | 24.17 | 323.73 |   |
| TP136 | JUBILIENI          | Bulgary    | round  |      | J-Temp | 80.33  | 28.31 | 319.80 |   |
| TP137 | KING               | Italy      | long B |      | J-Trop | 94.83  | 22.27 | 332.32 |   |
| TP138 | KRISTALLINO        |            |        |      | J-Temp | 87.97  | 28.21 | 501.83 | 1 |

|       |                  |          |        |      |        |        |       |        |   |
|-------|------------------|----------|--------|------|--------|--------|-------|--------|---|
| TP139 | KULON            | Russia   | long A |      | J-Temp | 82.50  | 25.21 | 367.43 | 1 |
| TP140 | L201             | USA      | long B |      | J-Trop | 96.00  | 17.15 | 307.66 |   |
| TP141 | L202             | USA      | long B |      | J-Trop | 100.33 | 20.98 | 303.54 | 1 |
| TP142 | L204             | USA      | long B |      | J-Trop | 93.67  | 24.51 | 350.21 |   |
| TP143 | L205             | USA      | long B |      | J-Trop | 98.33  | 19.05 | 328.90 |   |
| TP144 | LACASSINE        | USA      | long B |      | J-Trop | 106.83 | 24.10 | 279.00 |   |
| TP145 | LADY WRIGHT      | USA      | medium |      | J-Trop | 111.33 | 18.87 | 386.92 | 1 |
| TP146 | LAGRUE           | USA      | long A |      | J-Trop | 100.83 | 22.51 | 356.82 |   |
| TP147 | LAMONE           | Italy    | long B | 1999 | J-Trop | 94.50  | 23.09 | 291.53 |   |
| TP148 | LENCINO          | Italy    | round  | 1930 | J-Temp | 90.50  | 20.20 | 300.05 |   |
| TP149 | LIDO             | Italy    | medium | 1976 | J-Temp | 92.33  | 22.39 | 272.09 | 1 |
| TP150 | LOMELLINO        | Italy    | medium | 1982 | J-Temp | 79.83  | 24.40 | 305.30 |   |
| TP151 | LORD             | Italy    | long A | 1988 | J-Temp | 94.67  | 25.47 | 353.47 |   |
| TP152 | LUCERO           | Italy    | round  |      | J-Temp | 101.67 | 22.59 | 342.73 |   |
| TP153 | LUNA             | USA      | medium |      | J-Temp | 100.17 | 24.07 | 351.80 |   |
| TP154 | LUSITO IRRADIADO | Portugal | long A |      | J-Temp | 92.17  | 22.12 | 297.31 |   |
| TP155 | M202             | USA      | medium |      | J-Temp | 91.83  | 25.08 | 335.35 |   |
| TP156 | M203             | USA      | long A |      | J-Temp | 95.00  | 23.75 | 376.41 | 1 |
| TP157 | M204             | USA      | long A |      | J-Temp | 92.33  | 30.32 | 376.99 |   |
| TP158 | M6               | Italy    | long A |      | J-Temp | 90.67  | 26.69 | 330.40 |   |
| TP159 | MAIORAL          | Portugal | long A |      | J-Temp | 99.33  | 21.82 | 348.08 |   |
| TP160 | MANTOVA          | Italy    | long A | 1933 | J-Temp | 93.00  | 25.84 | 401.44 |   |
| TP161 | MARENY           | Spain    | long A |      | J-Temp | 91.67  | 25.68 | 430.71 |   |
| TP162 | MARTE            | Italy    | round  | 2000 | J-Temp | 93.67  | 30.26 | 332.84 |   |
| TP163 | MAYBELLE         | USA      | long B |      | J-Trop | 94.33  | 22.04 | 361.08 |   |
| TP164 | MECO             |          |        |      | J-Temp | 92.33  | 29.70 | 415.18 |   |
| TP165 | MEJANES          | France   | long B |      | J-Temp | 86.00  | 22.12 | 304.99 |   |
| TP166 | MELAS            | Greece   | long B |      | J-Temp | 94.83  | 23.12 | 248.89 |   |
| TP167 | MIARA            | Italy    | long B |      | J-Temp | 82.33  | 25.90 | 177.63 |   |
| TP168 | MILEV 21         | Bulgary  | round  |      | J-Temp | 89.33  | 22.04 | 447.78 |   |
| TP169 | MOLO             | Italy    | long A |      | J-Trop | 91.33  | 29.14 | 274.13 |   |
| TP170 | MONTICELLI       | Italy    | medium | 1967 | J-Temp | 92.67  | 22.82 | 446.11 |   |
| TP171 | MUGA             | Portugal | round  |      | J-Temp | 100.50 | 22.38 | 400.08 |   |
| TP172 | MUSA             |          |        |      | J-Temp | 89.17  | 21.89 | 297.33 | 1 |
| TP173 | NANO             | Italy    | round  |      | J-Temp | 105.17 | 31.82 | 351.69 |   |
| TP174 | NILO             | Italy    | long A |      | J-Temp | 93.50  | 24.71 | 213.14 |   |
| TP175 | NOVARA           | Italy    | medium | 1933 | J-Temp | 83.33  | 19.46 | 305.00 |   |
| TP176 | OLCENENGO        | Italy    | long A | 1957 | J-Temp | 91.83  | 21.61 | 491.57 |   |
| TP177 | ONICE            |          |        |      | J-Temp | 89.00  | 25.33 | 312.04 | 1 |
| TP178 | ORIGINARIO       | Italy    | round  | 1930 | J-Temp | 94.56  | 27.90 | 378.11 |   |
| TP179 | ORIONE           | Italy    | long A |      | J-Temp | 96.83  | 29.35 | 460.69 | 1 |
| TP180 | OSCARxSUWEON     | Portugal | long A |      | J-Temp | 95.67  | 21.88 | 416.00 |   |
| TP181 | OSTIGLIA         | Italy    | round  | 1923 | J-Temp | 88.00  | 19.36 | 289.14 |   |
| TP182 | OTA              | Portugal | long A |      | J-Temp | 103.17 | 18.32 | 412.54 |   |
| TP183 | P6               | Italy    | medium |      | J-Temp | 89.67  | 21.12 | 328.05 |   |
| TP184 | PADANO           | Italy    | long A |      | J-Temp | 96.17  | 27.79 | 434.67 |   |
| TP185 | PANDA            | Italy    |        | 1988 | J-Trop | 93.00  | 24.73 | 382.88 |   |
| TP186 | PEGONIL          | Spain    | medium |      | J-Temp | 97.50  | 23.99 | 487.45 |   |

|       |                   |           |        |      |        |        |       |        |   |
|-------|-------------------|-----------|--------|------|--------|--------|-------|--------|---|
| TP187 | PELDE             | Australia |        |      | J-Temp | 79.67  | 23.46 | 168.40 |   |
| TP188 | PIEMONTE          | Italy     | long A | 1983 | J-Temp | 93.50  | 29.06 | 467.27 |   |
| TP189 | PIERINA MARCHETTI | Italy     | long A |      | J-Temp | 93.00  | 25.22 | 544.97 |   |
| TP190 | PLOVDIV 22        | Bulgary   | long A |      | J-Temp | 81.17  | 25.12 | 338.32 |   |
| TP191 | PLOVDIV 24        | Bulgary   | round  |      | J-Temp | 90.19  | 30.26 | 388.40 |   |
| TP192 | PLUS              | Italy     | long B |      | J-Trop | 105.83 | 20.82 | 328.44 |   |
| TP193 | PREVER            | Italy     | long B | 1989 | J-Temp | 84.83  | 19.99 | 345.67 |   |
| TP194 | PROMETEO          | Italy     | medium | 1990 | J-Temp | 87.83  | 20.66 | 386.72 |   |
| TP195 | PUNTAL            | Spain     | long B | 1991 | J-Trop | 103.83 | 20.10 | 396.72 |   |
| TP196 | RANGHINO          | Italy     | round  |      | J-Temp | 83.50  | 22.47 | 247.38 |   |
| TP197 | RAZZA 77          | Italy     | medium |      | J-Temp | 88.33  | 25.86 | 370.34 |   |
| TP198 | REDI              | Italy     | long A | 1967 | J-Temp | 96.00  | 23.77 | 421.35 | 1 |
| TP199 | REXMONT           | USA       | long B |      | J-Trop | 105.50 | 22.48 | 308.55 |   |
| TP200 | RIBE              | Italy     | long A | 1967 | J-Temp | 94.67  | 30.04 | 339.84 | 1 |
| TP201 | RINALDO BERSANI   | Italy     | long A |      | J-Temp | 96.67  | 22.62 | 399.64 |   |
| TP202 | RINGO             | Italy     | long A | 1972 | J-Temp | 97.50  | 27.12 | 471.18 |   |
| TP203 | RIZZOTTO 51 1     | Italy     | long A |      | J-Temp | 98.33  | 23.35 | 497.59 |   |
| TP204 | ROBBIO SEL1       | Italy     | long A |      | J-Temp | 94.33  | 22.33 | 342.00 |   |
| TP205 | RODEO             | Italy     | long A | 2002 | J-Temp | 79.33  | 24.32 | 265.32 |   |
| TP206 | RODINA            | Bulgary   | round  |      | J-Temp | 92.50  | 18.92 | 479.80 |   |
| TP207 | ROMA              | Italy     | long A | 1967 | J-Temp | 97.33  | 20.67 | 530.46 |   |
| TP208 | RONALDO           | Italy     | long A |      | J-Temp | 93.33  | 24.78 | 377.14 | 1 |
| TP209 | RONCAROLO         |           |        |      | J-Temp | 99.33  | 22.99 | 503.40 |   |
| TP210 | RONCOLO           | Italy     | medium |      | J-Temp | 94.50  | 26.65 | 460.89 |   |
| TP211 | ROTUNDUS          | Hungary   | long A |      | J-Temp | 80.17  | 22.65 | 225.00 |   |
| TP212 | ROXANI            | Greece    | long A |      | J-Temp | 101.67 | 21.90 | 426.48 |   |
| TP213 | RPC 12            | China     | round  |      | J-Temp | 81.67  | 24.12 | 219.03 | 1 |
| TP214 | RUBI              | Portugal  |        |      | J-Temp | 96.50  | 28.04 | 341.08 |   |
| TP215 | RUBINO            | Italy     | round  | 1978 | J-Temp | 96.83  | 24.95 | 494.54 |   |
| TP216 | RUSSO             | Italy     |        |      | J-Temp | 73.50  | 20.13 | 197.95 |   |
| TP217 | S101              | USA       | medium |      | J-Temp | 88.83  | 24.83 | 313.95 | 1 |
| TP218 | SAEDINENIE        | Bulgary   | long A |      | J-Temp | 80.50  | 22.85 | 420.40 |   |
| TP219 | SAFARI            | Portugal  | long A |      | J-Temp | 95.83  | 26.94 | 413.12 |   |
| TP220 | SAGRES            | Portugal  | long A |      | J-Temp | 102.00 | 20.94 | 340.56 |   |
| TP221 | SAKHA 102         | Egypt     | medium |      | J-Temp | 99.33  | 21.63 | 309.92 |   |
| TP222 | SAKHA 103         | Egypt     | round  |      | J-Temp | 99.50  | 23.27 | 327.95 |   |
| TP223 | SALOIO            | Portugal  | long B |      | J-Temp | 88.33  | 22.83 | 263.52 |   |
| TP224 | SALVO             | Italy     | long B | 2008 | J-Trop | 92.17  | 20.28 | 308.80 | 1 |
| TP225 | SAMBA             | Italy     | long A |      | J-Trop | 89.17  | 26.73 | 325.36 |   |
| TP226 | SANDOCA           | Portugal  | long B |      | J-Temp | 101.00 | 22.30 | 350.28 |   |
| TP227 | SANDORA           | Hungary   | long A |      | J-Temp | 74.33  | 21.13 | 162.66 |   |
| TP228 | SANTANDREA        | Italy     | long A | 1974 | J-Temp | 91.17  | 21.82 | 426.91 |   |
| TP229 | SANTERNO          | Italy     | long B | 1998 | J-Temp | 99.17  | 18.59 | 291.84 |   |
| TP230 | SATURNO           | Italy     | long B |      | J-Trop | 89.67  | 26.38 | 246.46 | 1 |
| TP231 | SAVIO             | Italy     | long A | 1995 | J-Temp | 88.50  | 26.84 | 289.26 |   |
| TP232 | SCUDO             | Italy     | long B |      | J-Trop | 93.33  | 19.48 | 333.98 |   |
| TP233 | SELN 244A620      | Australia | medium |      | J-Temp | 96.00  | 23.99 | 328.78 |   |
| TP234 | SENATORE NOVELLI  | Italy     | long A |      | J-Temp | 92.33  | 19.44 | 315.21 | 1 |

|       |              |           |        |      |        |        |       |        |   |
|-------|--------------|-----------|--------|------|--------|--------|-------|--------|---|
| TP235 | SENIA        | Spain     | medium | 1986 | J-Temp | 94.83  | 26.50 | 368.78 | 1 |
| TP236 | SEQUIAL      | Spain     | medium |      | J-Temp | 93.17  | 26.82 | 307.78 |   |
| TP237 | SEZIA        | Italy     | long A |      | J-Temp | 93.17  | 25.64 | 305.01 |   |
| TP238 | SESIAMOCHI   | Italy     | long A |      | J-Temp | 90.00  | 24.30 | 439.40 | 1 |
| TP239 | SETANTUNO    | Portugal  | round  |      | J-Temp | 95.00  | 23.07 | 652.79 | 1 |
| TP240 | SFERA        |           |        |      | J-Temp | 89.50  | 24.26 | 225.78 | 1 |
| TP241 | SHSS 381     | Spain     | long A |      | J-Temp | 96.00  | 26.77 | 432.23 | 1 |
| TP242 | SHSS 53      | Spain     | long A |      | J-Temp | 96.17  | 26.90 | 363.70 |   |
| TP243 | SILLA        | Italy     | long A | 1973 | J-Temp | 83.83  | 24.67 | 338.02 |   |
| TP244 | SIRIO        | Italy     | long A |      | J-Trop | 85.17  | 26.43 | 336.75 | 1 |
| TP245 | SLAVA        | Bulgary   | medium |      | J-Temp | 91.50  | 23.22 | 302.95 |   |
| TP246 | SMERALDO     | Italy     | long A | 1982 | J-Temp | 89.33  | 29.77 | 400.42 |   |
| TP247 | SOURE        | Portugal  | long A |      | J-Temp | 94.50  | 20.17 | 303.65 |   |
| TP248 | SPRINT       | Italy     | long B | 2002 | J-Trop | 88.33  | 25.62 | 270.30 |   |
| TP249 | SR 113       | Spain     | long A |      | J-Temp | 92.50  | 23.59 | 385.38 | 1 |
| TP250 | STRELLA      | Italy     | long A | 1981 | J-Temp | 91.83  | 24.38 | 338.97 |   |
| TP251 | SUPER        | Portugal  |        |      | J-Temp | 92.67  | 23.99 | 352.16 |   |
| TP252 | T757         | India     |        |      | J-Temp | 91.17  | 27.14 | 423.91 |   |
| TP253 | TAICHUNG 65  | Thailand  |        |      | J-Temp | 94.00  | 27.95 | 341.79 |   |
| TP254 | TEXMONT      | USA       | long A |      | J-Trop | 98.33  | 26.89 | 311.49 |   |
| TP255 | THAIBONNET   | Italy     | long B | 1992 | J-Trop | 101.83 | 17.91 | 275.32 | 1 |
| TP256 | THAIPERLA    |           |        |      | J-Temp | 92.00  | 25.94 | 370.25 | 1 |
| TP257 | TITANIO      | Italy     |        |      | J-Temp | 77.33  | 26.36 | 360.47 | 1 |
| TP258 | TOPAZIO      | Italy     | medium |      | J-Temp | 80.83  | 22.74 | 343.45 |   |
| TP259 | TORIO        | Portugal  | long A |      | J-Temp | 91.33  | 23.95 | 417.37 |   |
| TP260 | ULISSE       | Italy     | long A |      | J-Temp | 93.17  | 30.12 | 360.36 |   |
| TP261 | ULLAL        | Spain     | round  | 1998 | J-Temp | 91.17  | 33.12 | 379.08 |   |
| TP262 | UPLA 32      | Argentina | long B |      | J-Trop | 96.50  | 22.36 | 218.18 |   |
| TP263 | UPLA 63      | Argentina | long B |      | J-Trop | 101.83 | 16.86 | 295.25 |   |
| TP264 | UPLA 64      | Argentina | long B |      | J-Trop | 94.33  | 19.53 | 278.03 |   |
| TP265 | UPLA 66      | Argentina | long B |      | J-Trop | 93.67  | 20.42 | 277.94 |   |
| TP266 | UPLA 68      | Argentina | long B |      | J-Trop | 102.00 | 18.91 | 304.48 |   |
| TP267 | UPLA 75      | Argentina | long B |      | J-Trop | 101.67 | 21.23 | 286.16 |   |
| TP268 | UPLA 77      | Argentina | long B |      | J-Trop | 98.33  | 22.77 | 244.43 |   |
| TP269 | UPLA 80      | Argentina | long B |      | J-Trop | 94.50  | 22.13 | 348.41 |   |
| TP270 | UPLA 91      | Argentina | long B |      | J-Trop | 101.05 | 21.41 | 320.25 |   |
| TP271 | VALTEJO      | Portugal  | round  |      | J-Temp | 96.50  | 21.62 | 384.50 |   |
| TP272 | VELA         | Italy     | long A |      | J-Temp | 96.33  | 21.31 | 255.84 |   |
| TP273 | VENERE       | Italy     | long B | 1997 | J-Temp | 84.67  | 20.32 | 209.37 |   |
| TP274 | VENERIA      | Italy     | long A | 1978 | J-Temp | 92.17  | 25.14 | 456.15 | 1 |
| TP275 | VIALE        | Italy     | long A |      | J-Temp | 90.33  | 26.47 | 316.98 |   |
| TP276 | VIALONE 190  | Italy     | medium |      | J-Temp | 91.17  | 21.37 | 343.68 | 1 |
| TP277 | VIALONE NERO |           |        |      | J-Temp | 97.50  | 18.56 | 422.61 | 1 |
| TP278 | VICTORIA     | Argentina | round  |      | J-Temp | 89.33  | 19.40 | 268.07 | 1 |
| TP279 | VIRGO        |           |        |      | J-Temp | 88.00  | 27.42 | 465.88 |   |
| TP280 | VULCANO      |           |        |      | J-Temp | 97.50  | 23.05 | 499.76 |   |
| TP281 | XIANGHU2     |           |        |      | J-temp | 93.50  | 19.82 | 277.02 |   |
| TP282 | YRM 6 2      | Australia | medium |      | J-Temp | 94.33  | 27.33 | 412.06 |   |

|       |        |       |        |      |        |        |       |        |   |
|-------|--------|-------|--------|------|--------|--------|-------|--------|---|
| TP283 | ZENA   | Italy | long B | 1994 | J-Trop | 91.33  | 20.84 | 343.71 | 1 |
| TP284 | ZENITH | USA   | medium |      | J-Trop | 116.00 | 15.59 | 324.08 |   |
