# Supplementary material for: Rice diversity panel provides accurate genomic predictions for complex traits in the progenies of biparental crosses involving members of the panel
Source: PubMed Central journal article supplement (PMC5787227; doi:10.1007/s00122-017-3011-4), 2017-11-14
Supplement: 122_2017_3011_MOESM2_ESM.pdf [file 122_2017_3011_MOESM2_ESM.pdf]

**Supplementary Table 2:** List of the 97 F5-F7 lines of the progeny population and their phenotype for days to flowering (FL), nitrogen balance index (NI) and 100 panicles weight (PW).

| <b>Genotype</b> | <b>Crosses</b>             | <b>FL (days)</b> | <b>NI</b> | <b>PW (g)</b> |
|-----------------|----------------------------|------------------|-----------|---------------|
| PF043           | Aiace / Perla              | 97.83            | 15.42     | 184.71        |
| PF048           | Apollo / Volano            | 96.50            | 15.64     | 272.91        |
| PF031           | Apollo/Selenio//Apollo     | 92.33            | 17.14     | 216.46        |
| PF081           | Apollo/Selenio//Apollo     | 94.00            | 16.76     | 255.47        |
| PF057           | Asia / 2*Selenio           | 94.83            | 20.34     | 316.05        |
| PF058           | Asia / 2*Selenio           | 94.83            | 19.00     | 195.4         |
| PF059           | Asia / 2*Selenio           | 107.00           | 20.86     | 210.07        |
| PF085           | Asia / Centauro            | 97.00            | 17.23     | 182.2         |
| PF087           | Asia / Centauro            | 96.33            | 17.11     | 243.27        |
| PF030           | Augusto / Gigante Vercelli | 80.17            | 22.66     | 281.54        |
| PF069           | Augusto / Handao 297       | 94.67            | 20.38     | 173.15        |
| PF070           | Augusto / Handao 297       | 95.33            | 19.95     | 227.75        |
| PF042           | Baldo / Handao 297         | 91.50            | 19.29     | 398.7         |
| PF052           | Baldo / Handao 297         | 85.50            | 22.22     | 303.79        |
| PF053           | Baldo / Handao 297         | 90.67            | 18.91     | 285.46        |
| PF055           | Baldo / Handao 297         | 90.17            | 17.72     | 284.33        |
| PF019           | Baldo / Opale              | 90.67            | 17.58     | 292.24        |
| PF020           | Baldo / Opale              | 91.67            | 18.93     | 380.09        |
| PF021           | Baldo / Opale              | 96.17            | 17.77     | 328.84        |
| PF022           | Baldo / Opale              | 90.33            | 18.78     | 274.58        |
| PF023           | Baldo / Opale              | 83.83            | 17.45     | 278.17        |
| PF024           | Baldo / Opale              | 90.83            | 18.55     | 286.5         |
| PF015           | Carmen / Creso             | 95.00            | 18.17     | 323.01        |
| PF016           | Carmen / Creso             | 93.50            | 17.71     | 301.36        |
| PF017           | Carmen / Creso             | 95.50            | 16.32     | 325.19        |
| PF026           | Carmen / Loto              | 89.26            | 17.28     | 276.74        |
| PF027           | Carmen / Loto              | 88.83            | 19.63     | 182.44        |
| PF068           | Centauro / Dimitra         | 89.00            | 20.94     | 259.01        |
| PF051           | Centauro / Koral           | 83.33            | 21.77     | 289.97        |
| PF071           | Centauro / Koral           | 100.17           | 23.66     | 286.79        |
| PF072           | Centauro / Koral           | 86.33            | 20.91     | 254.45        |
| PF073           | Centauro / Koral           | 99.83            | 23.96     | 280.09        |
| PF047           | Creso / Apollo             | 91.50            | 18.25     | 259.26        |
| PF001           | Delfino / 2*Centauro       | 88.67            | 18.84     | 248.21        |
| PF002           | Delfino / 2*Centauro       | 92.00            | 19.18     | 256.57        |
| PF067           | Delfino / Centauro         | 95.00            | 21.56     | 342.31        |
| PF100           | Delfino / Selenio          | 84.00            | 19.12     | 196.06        |
| PF084           | Eurosis / Gladio           | 88.67            | 15.75     | 233.59        |
| PF004           | Eurosis / Handao 11        | 88.00            | 18.17     | 303.74        |
| PF005           | Eurosis / Handao 11        | 86.00            | 12.21     | 228.03        |
| PF006           | Eurosis / Handao 11        | 90.93            | 18.91     | 320.01        |
| PF007           | Eurosis / Handao 11        | 97.67            | 19.17     | 293.16        |
| PF008           | Eurosis / Handao 11        | 102.50           | 18.19     | 308.41        |

|       |                           |        |       |        |
|-------|---------------------------|--------|-------|--------|
| PF009 | Eurosis / Handao 11       | 96.83  | 15.53 | 245.35 |
| PF010 | Eurosis / Handao 11       | 102.50 | 14.59 | 240.41 |
| PF011 | Eurosis / Handao 11       | 95.00  | 17.18 | 299.83 |
| PF012 | Eurosis / Handao 11       | 92.83  | 17.37 | 363.48 |
| PF013 | Eurosis / Handao 11       | 101.50 | 17.72 | 298.86 |
| PF028 | Eurosis / Handao 11       | 83.67  | 18.31 | 240.69 |
| PF032 | Eurosis / Handao 11       | 108.83 | 19.14 | 256.69 |
| PF033 | Eurosis / Handao 11       | 90.50  | 25.13 | 247.38 |
| PF034 | Eurosis / Handao 11       | 96.33  | 16.38 | 240.44 |
| PF035 | Eurosis / Handao 11       | 88.83  | 18.90 | 287.98 |
| PF036 | Eurosis / Handao 11       | 92.83  | 20.43 | 248.68 |
| PF037 | Eurosis / Handao 11       | 91.00  | 20.33 | 241.5  |
| PF038 | Eurosis / Handao 11       | 91.33  | 14.71 | 266.5  |
| PF039 | Eurosis / Handao 11       | 98.00  | 15.85 | 304.32 |
| PF046 | Eurosis / Handao 11       | 87.67  | 15.57 | 283.06 |
| PF082 | Fragrance / Karnak        | 107.50 | 21.35 | 219.11 |
| PF091 | Giano / Loto              | 89.50  | 18.37 | 155.66 |
| PF025 | Giano / Vialone Nano      | 90.83  | 17.84 | 391.12 |
| PF054 | Giano / Vialone Nano      | 86.33  | 15.41 | 222.66 |
| PF092 | Giano / Vialone Nano      | 89.83  | 18.95 | 395.66 |
| PF093 | Giano / Vialone Nano      | 90.50  | 19.66 | 397.67 |
| PF094 | Giano / Vialone Nano      | 94.17  | 18.59 | 268.45 |
| PF095 | Giano / Vialone Nano      | 93.33  | 20.08 | 210.72 |
| PF096 | Giano / Vialone Nano      | 90.17  | 16.89 | 243.39 |
| PF097 | Giano / Vialone Nano      | 91.33  | 19.50 | 267.96 |
| PF098 | Giano / Vialone Nano      | 94.17  | 20.64 | 219.17 |
| PF060 | Gladio / Eurosis / Gladio | 90.00  | 16.62 | 384.51 |
| PF061 | Gladio / Opale            | 96.50  | 16.63 | 276.44 |
| PF062 | Gladio / Opale            | 89.33  | 17.80 | 417.21 |
| PF063 | Gladio / Opale            | 88.83  | 14.40 | 319.45 |
| PF064 | Gladio / Opale            | 98.17  | 14.49 | 219.05 |
| PF065 | Gladio / Opale            | 92.67  | 17.17 | 341.53 |
| PF066 | Gladio / Opale            | 97.17  | 18.15 | 292.72 |
| PF049 | Handao 297 / Luxor        | 89.33  | 18.73 | 322.09 |
| PF050 | Handao 297 / Luxor        | 98.17  | 20.34 | 275.73 |
| PF040 | Karnak / 2*Giano          | 94.67  | 18.17 | 290.98 |
| PF041 | Karnak / 2*Giano          | 96.00  | 20.00 | 304.77 |
| PF076 | Karnak / Delfino          | 95.67  | 18.12 | 354.78 |
| PF077 | Karnak / Delfino          | 95.33  | 19.48 | 349.45 |
| PF078 | Karnak / Delfino          | 95.67  | 18.57 | 337.78 |
| PF075 | Karnak / Giano            | 96.33  | 17.23 | 292.19 |
| PF088 | Karnak / Giano            | 96.50  | 17.36 | 207.7  |
| PF056 | Loto / Karnak             | 93.33  | 18.88 | 288.34 |
| PF044 | Maratelli / Carmen        | 84.17  | 20.52 | 269.72 |
| PF045 | Maratelli / Carmen        | 85.67  | 20.44 | 273.15 |
| PF083 | Pecos / Delfino           | 89.50  | 17.10 | 322.59 |
| PF014 | Pecos / Gladio            | 92.00  | 19.43 | 221.21 |
| PF099 | Pecos / Gladio            | 101.83 | 18.14 | 234.23 |

|       |                      |       |       |        |
|-------|----------------------|-------|-------|--------|
| PF089 | SIS R215 / Carnaroli | 91.17 | 18.32 | 239.18 |
| PF090 | SIS R215 / Carnaroli | 87.17 | 19.45 | 235.35 |
| PF079 | SIS R215 / Loto      | 90.67 | 19.08 | 337.12 |
| PF080 | SIS R215 / Loto      | 91.42 | 16.22 | 305.25 |
| PF029 | Tejo / Aiace         | 90.50 | 19.30 | 219.68 |
| PF074 | Tejo / Centauro      | 93.83 | 23.48 | 330.89 |

---
