# Supplementary material for: Rice diversity panel provides accurate genomic predictions for complex traits in the progenies of biparental crosses involving members of the panel
Source: PubMed Central journal article supplement (PMC5787227; doi:10.1007/s00122-017-3011-4), 2017-11-14
Supplement: 122_2017_3011_MOESM6_ESM.pdf [file 122_2017_3011_MOESM6_ESM.pdf]

**Supplementary Table 6:** Accuracy of genomic prediction of progeny phenotype for days to flowering (FL), nitrogen balance index (NI) and 100 panicles weight (PW), obtain with three statistical methods, Bayes B, GBLUP and RKHS, under six scenarios of relatedness between the training and the progeny set.

| Scenario | r <sup>2</sup> | MAF (%) | FL     |       |      | NI     |       |      | PW     |       |      |
|----------|----------------|---------|--------|-------|------|--------|-------|------|--------|-------|------|
|          |                |         | BayesB | GBLUP | RKHS | BayesB | GBLUP | RKHS | BayesB | GBLUP | RKHS |
| S1       | 0.25           | 5       | 0.25   | 0.27  | 0.26 | 0.19   | 0.20  | 0.09 | 0.48   | 0.49  | 0.48 |
|          | 0.36           | 5       | 0.28   | 0.30  | 0.28 | 0.24   | 0.24  | 0.13 | 0.50   | 0.52  | 0.49 |
|          | 0.49           | 5       | 0.28   | 0.32  | 0.30 | 0.18   | 0.19  | 0.13 | 0.53   | 0.54  | 0.50 |
|          | 0.64           | 5       | 0.27   | 0.25  | 0.30 | 0.17   | 0.16  | 0.12 | 0.50   | 0.50  | 0.47 |
|          | 0.81           | 5       | 0.28   | 0.26  | 0.30 | 0.18   | 0.18  | 0.15 | 0.46   | 0.48  | 0.47 |
|          | 0.98           | 5       | 0.27   | 0.24  | 0.28 | 0.20   | 0.19  | 0.23 | 0.45   | 0.49  | 0.45 |
|          | 1a             | 5       | 0.26   | 0.23  | 0.29 | 0.20   | 0.19  | 0.26 | 0.44   | 0.51  | 0.42 |
|          | 1b             | 2.5     | 0.25   | 0.23  | 0.28 | 0.18   | 0.18  | 0.23 | 0.46   | 0.52  | 0.43 |
| S2       | 0.25           | 5       | 0.35   | 0.34  | 0.35 | 0.23   | 0.23  | 0.24 | 0.28   | 0.30  | 0.29 |
|          | 0.36           | 5       | 0.37   | 0.37  | 0.39 | 0.30   | 0.31  | 0.32 | 0.30   | 0.30  | 0.28 |
|          | 0.49           | 5       | 0.46   | 0.44  | 0.45 | 0.37   | 0.36  | 0.36 | 0.33   | 0.29  | 0.27 |
|          | 0.64           | 5       | 0.40   | 0.41  | 0.42 | 0.40   | 0.38  | 0.39 | 0.31   | 0.31  | 0.28 |
|          | 0.81           | 5       | 0.41   | 0.40  | 0.42 | 0.40   | 0.41  | 0.38 | 0.29   | 0.32  | 0.27 |
|          | 0.98           | 5       | 0.33   | 0.32  | 0.35 | 0.33   | 0.31  | 0.34 | 0.28   | 0.29  | 0.22 |
|          | 1a             | 5       | 0.31   | 0.27  | 0.31 | 0.24   | 0.22  | 0.27 | 0.31   | 0.33  | 0.28 |
|          | 1b             | 2.5     | 0.31   | 0.28  | 0.32 | 0.23   | 0.22  | 0.28 | 0.36   | 0.37  | 0.34 |
| S3       | 0.25           | 5       | 0.29   | 0.32  | 0.31 | 0.27   | 0.28  | 0.28 | 0.45   | 0.44  | 0.44 |
|          | 0.36           | 5       | 0.33   | 0.32  | 0.29 | 0.34   | 0.36  | 0.36 | 0.46   | 0.43  | 0.43 |
|          | 0.49           | 5       | 0.40   | 0.39  | 0.37 | 0.39   | 0.36  | 0.39 | 0.48   | 0.46  | 0.44 |
|          | 0.64           | 5       | 0.38   | 0.35  | 0.37 | 0.42   | 0.38  | 0.42 | 0.45   | 0.45  | 0.44 |
|          | 0.81           | 5       | 0.39   | 0.36  | 0.39 | 0.42   | 0.40  | 0.41 | 0.42   | 0.44  | 0.44 |
|          | 0.98           | 5       | 0.35   | 0.32  | 0.34 | 0.38   | 0.40  | 0.38 | 0.38   | 0.41  | 0.40 |
|          | 1a             | 5       | 0.31   | 0.29  | 0.33 | 0.34   | 0.37  | 0.34 | 0.41   | 0.43  | 0.41 |
|          | 1b             | 2.5     | 0.31   | 0.28  | 0.32 | 0.33   | 0.35  | 0.34 | 0.42   | 0.45  | 0.44 |
|          | 0.25           | 5       | 0.31   | 0.31  | 0.30 | 0.30   | 0.31  | 0.31 | 0.35   | 0.34  | 0.31 |

|    |      |             |             |             |             |             |             |             |             |             |             |
|----|------|-------------|-------------|-------------|-------------|-------------|-------------|-------------|-------------|-------------|-------------|
| S4 | 0.36 | 5           | 0.33        | 0.32        | 0.32        | 0.44        | 0.42        | 0.44        | 0.36        | 0.35        | 0.44        |
|    | 0.49 | 5           | 0.42        | 0.34        | 0.40        | 0.52        | 0.49        | 0.50        | 0.39        | 0.39        | 0.50        |
|    | 0.64 | 5           | 0.45        | 0.38        | 0.43        | 0.48        | 0.47        | 0.48        | 0.39        | 0.39        | 0.48        |
|    | 0.81 | 5           | 0.41        | 0.35        | 0.40        | 0.49        | 0.48        | 0.49        | 0.40        | 0.39        | 0.49        |
|    | 0.98 | 5           | 0.36        | 0.37        | 0.36        | 0.46        | 0.46        | 0.46        | 0.38        | 0.38        | 0.46        |
|    | 1a   | 5           | 0.31        | 0.35        | 0.30        | 0.45        | 0.45        | 0.45        | 0.37        | 0.38        | 0.45        |
|    | 1b   | 2.5         | 0.27        | 0.31        | 0.28        | 0.42        | 0.42        | 0.43        | 0.38        | 0.39        | 0.43        |
| S5 | 0.25 | 5           | 0.39        | 0.39        | 0.38        | 0.18        | 0.20        | 0.20        | 0.18        | 0.18        | 0.17        |
|    | 0.36 | 5           | 0.40        | 0.39        | 0.38        | 0.34        | 0.32        | 0.34        | 0.21        | 0.19        | 0.19        |
|    | 0.49 | 5           | 0.48        | 0.43        | 0.47        | 0.43        | 0.37        | 0.42        | 0.27        | 0.26        | 0.26        |
|    | 0.64 | 5           | 0.51        | 0.49        | 0.51        | 0.43        | 0.41        | 0.43        | 0.28        | 0.28        | 0.28        |
|    | 0.81 | 5           | 0.46        | 0.44        | 0.46        | 0.44        | 0.42        | 0.45        | 0.30        | 0.30        | 0.30        |
|    | 0.98 | 5           | 0.39        | 0.43        | 0.40        | 0.41        | 0.40        | 0.41        | 0.29        | 0.29        | 0.29        |
|    | 1a   | 5           | 0.30        | 0.40        | 0.32        | 0.38        | 0.38        | 0.39        | 0.31        | 0.30        | 0.30        |
| 1b | 2.5  | 0.28        | 0.34        | 0.29        | 0.38        | 0.36        | 0.38        | 0.31        | 0.31        | 0.31        |             |
| S6 | 0.25 | 5           | 0.19 ± 0.01 | 0.19 ± 0.01 | 0.19 ± 0.01 | 0.12 ± 0.01 | 0.14 ± 0.01 | 0.13 ± 0.01 | 0.21 ± 0.01 | 0.24 ± 0.01 | 0.23 ± 0.01 |
|    | 0.36 | 5           | 0.20 ± 0.01 | 0.19 ± 0.01 | 0.20 ± 0.01 | 0.18 ± 0.01 | 0.21 ± 0.01 | 0.20 ± 0.01 | 0.24 ± 0.01 | 0.28 ± 0.01 | 0.27 ± 0.01 |
|    | 0.49 | 5           | 0.21 ± 0.01 | 0.19 ± 0.01 | 0.20 ± 0.01 | 0.22 ± 0.01 | 0.22 ± 0.01 | 0.23 ± 0.01 | 0.28 ± 0.01 | 0.33 ± 0.01 | 0.31 ± 0.01 |
|    | 0.64 | 5           | 0.21 ± 0.01 | 0.22 ± 0.01 | 0.22 ± 0.01 | 0.24 ± 0.01 | 0.24 ± 0.01 | 0.26 ± 0.01 | 0.30 ± 0.01 | 0.35 ± 0.01 | 0.33 ± 0.01 |
|    | 0.81 | 5           | 0.19 ± 0.01 | 0.19 ± 0.01 | 0.18 ± 0.01 | 0.24 ± 0.01 | 0.23 ± 0.01 | 0.26 ± 0.01 | 0.32 ± 0.01 | 0.36 ± 0.01 | 0.35 ± 0.01 |
|    | 0.98 | 5           | 0.12 ± 0.01 | 0.12 ± 0.01 | 0.11 ± 0.01 | 0.21 ± 0.02 | 0.21 ± 0.02 | 0.24 ± 0.01 | 0.30 ± 0.01 | 0.34 ± 0.01 | 0.33 ± 0.01 |
|    | 1a   | 5           | 0.06 ± 0.01 | 0.07 ± 0.01 | 0.06 ± 0.01 | 0.20 ± 0.02 | 0.18 ± 0.02 | 0.23 ± 0.02 | 0.30 ± 0.01 | 0.34 ± 0.01 | 0.33 ± 0.01 |
| 1b | 2.5  | 0.06 ± 0.01 | 0.07 ± 0.01 | 0.05 ± 0.01 | 0.19 ± 0.02 | 0.19 ± 0.02 | 0.23 ± 0.02 | 0.29 ± 0.01 | 0.33 ± 0.01 | 0.32 ± 0.01 |             |

1-a and 1-b, represent incidence matrixes without selection on  $r^2$ , but filtered with MAF > 5 % and MAF > 2.5%, respectively
